# Supplementary material for: Kinetic and data-driven modeling of pancreatic β-cell central carbon metabolism and insulin secretion
Source: PubMed Central journal article supplement (PMC9612825; doi:10.1371/journal.pcbi.1010555), 2022-10-17

**Figure B. eFAST sensitivity analysis.** A global sensitivity analysis was used to identify  $V_{max}$  values that significantly affect the predicted metabolite concentrations at different time points (based on experiments).

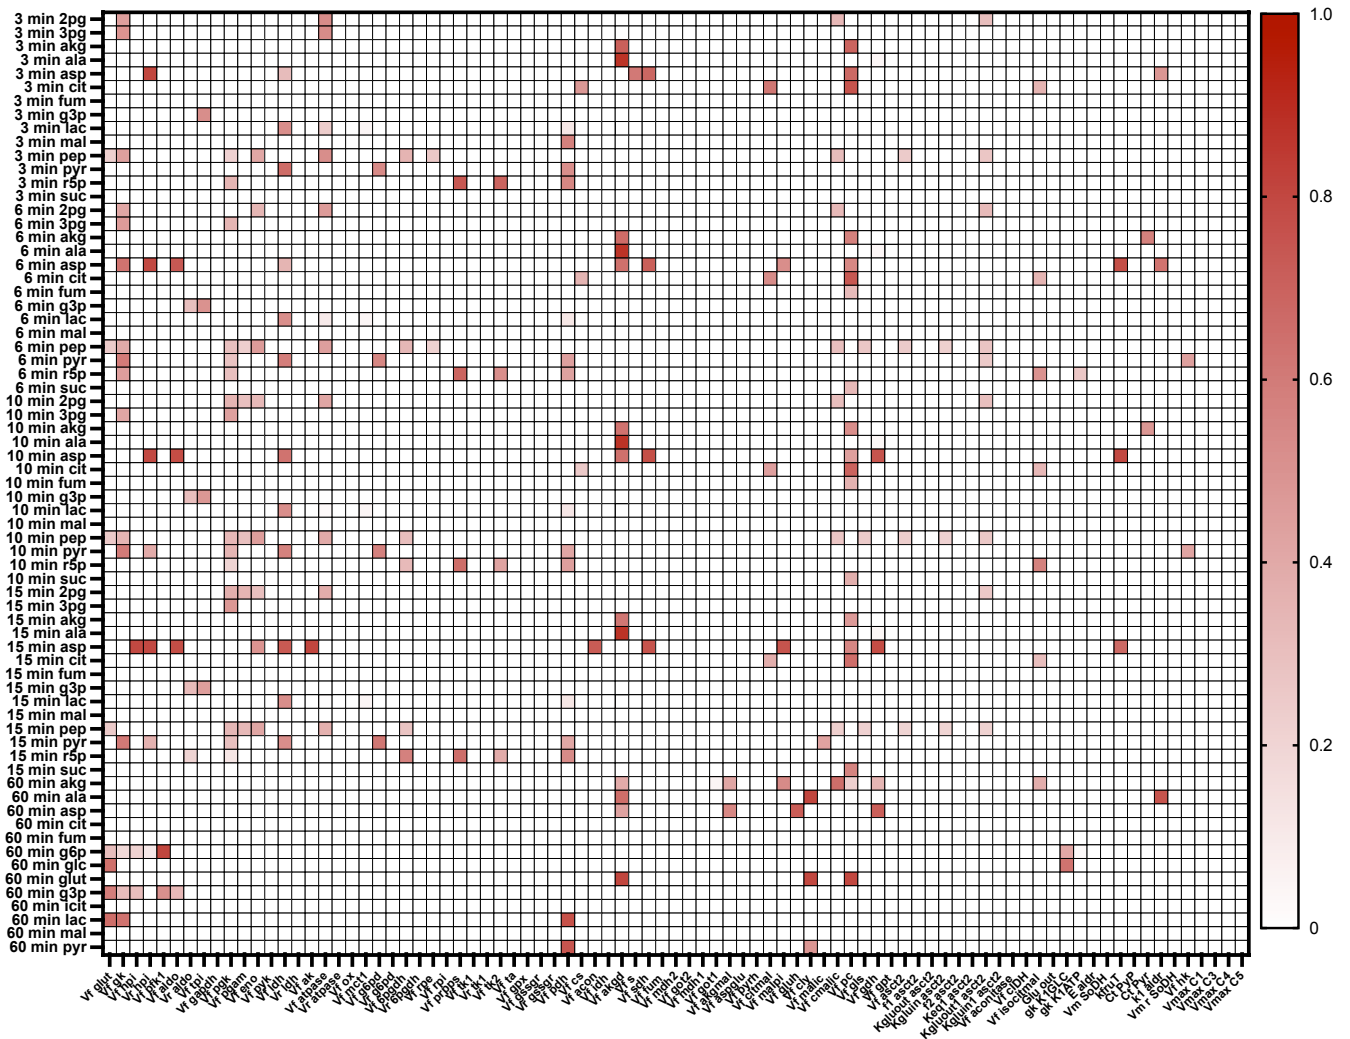

**Figure C. Estimated parameter values.** Having run an eFAST sensitivity analysis, 32 model parameters were found to be influential and were subsequently fit using PSO. The 8 best parameter fits were used for all subsequent analyses and for building the partial least squares regression model. The distribution of fitted model parameter values is shown here.

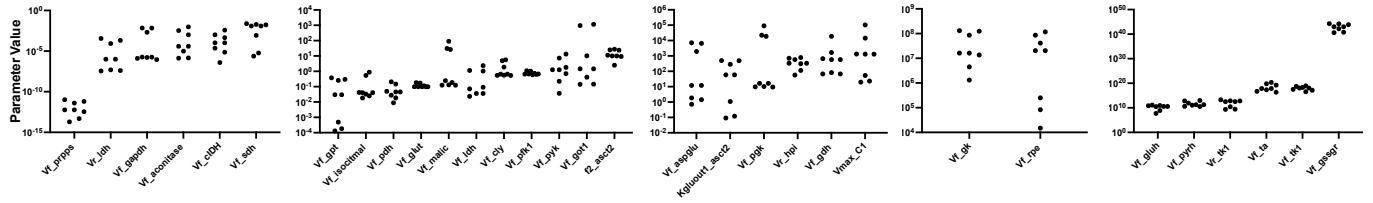

**Figure D. Predicted metabolite timecourses.** Intracellular metabolite amounts, simulating treatment with 16.7mM glucose. All metabolites converge to steady state concentrations. Each subplot shows the average and standard deviation of 8 distinct parameter sets.

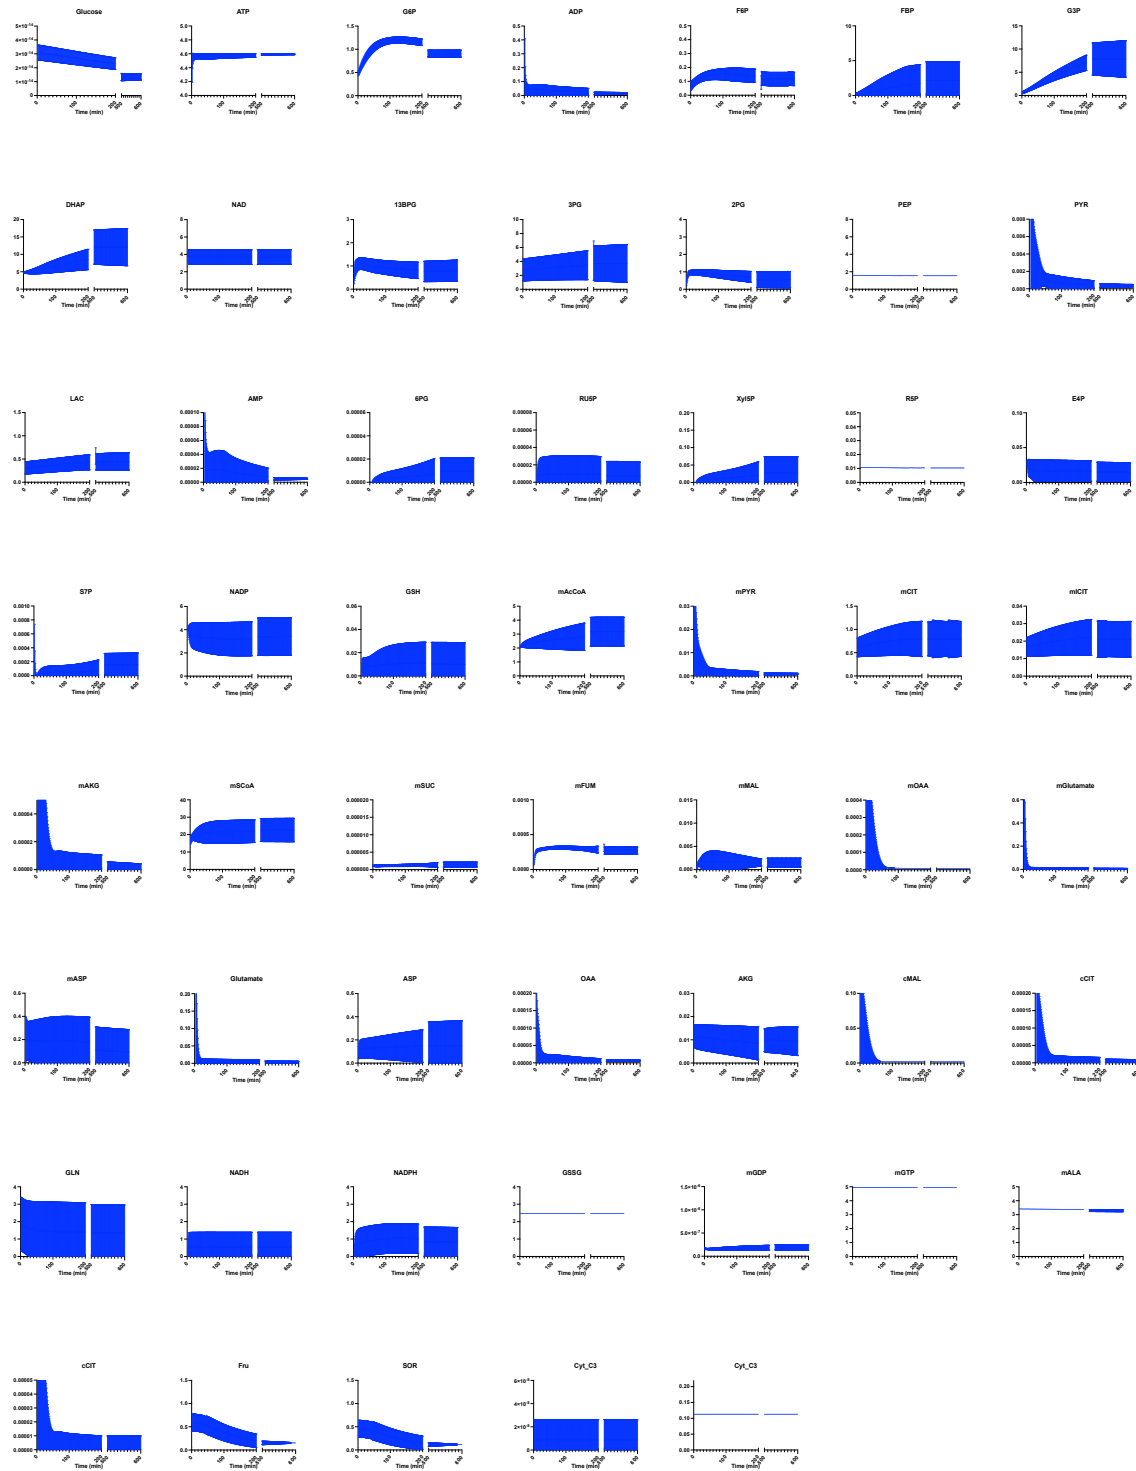

**Figure E. Flux data collected from published literature.** Comparison of model predictions (blue) to experimentally measured flux measurements not used in model fitting (gray).

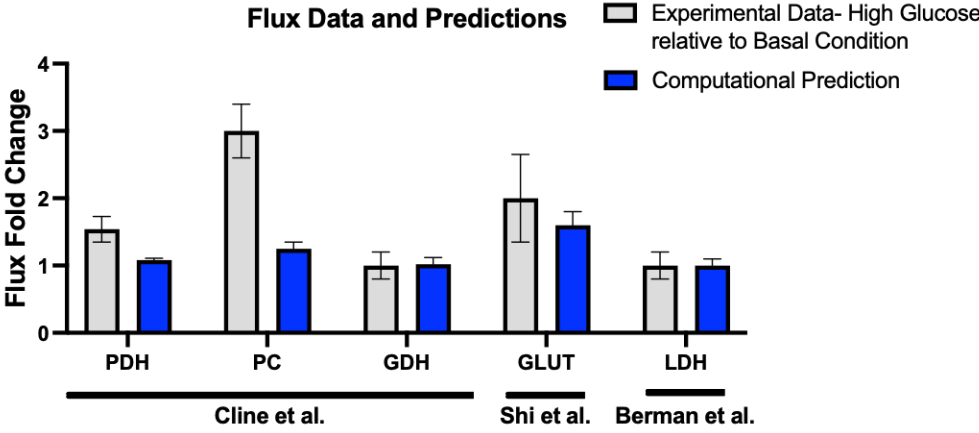

**Figure F. Effect of *ak* reaction perturbation.** We perturbed the adenylate kinase reaction by increasing its  $V_{max}$  value by a factor of 5, and assessed the effect on the network, comparing metabolite levels, reaction fluxes, and insulin secretion to the unperturbed condition.

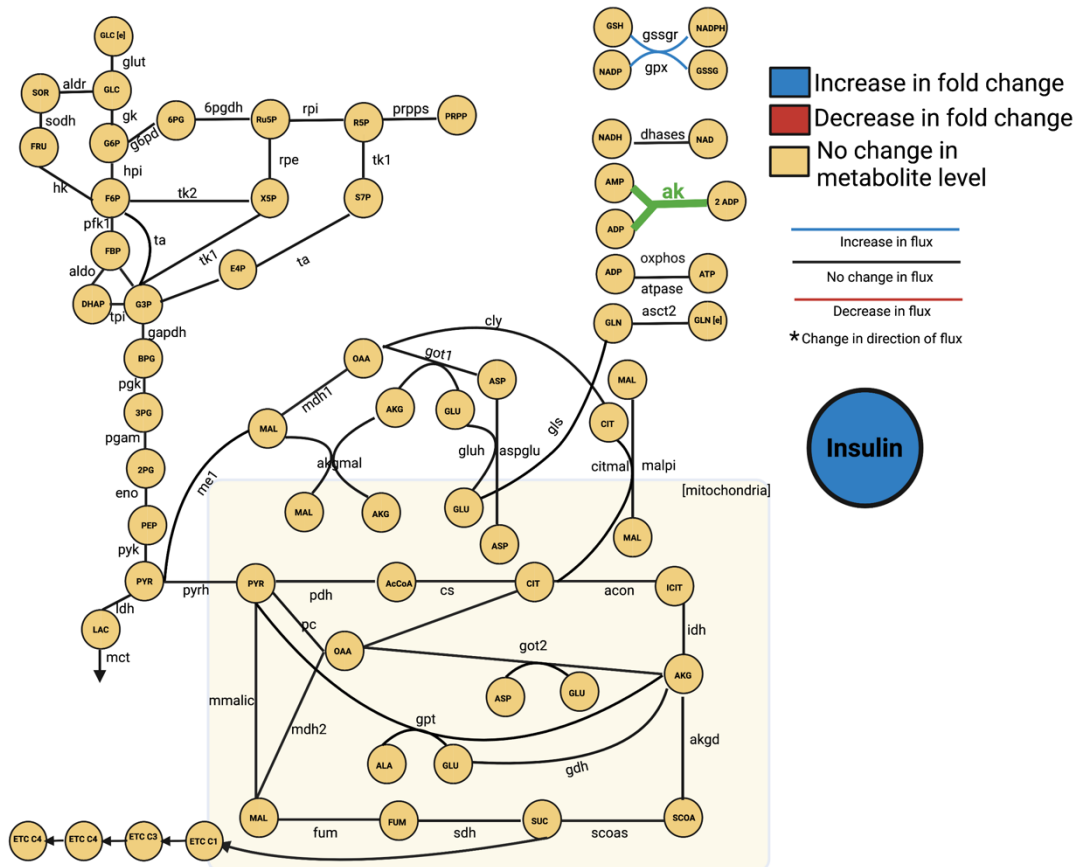

Supplement: pcbi.1010555.s006.pdf [file pcbi.1010555.s006.pdf]
